# Supplementary material for: Epibiont hydroids on beachcast Sargassum in the Mexican Caribbean
Source: PeerJ. 2020 Aug 24;8:e9795. doi: 10.7717/peerj.9795 (PMC7450996; doi:10.7717/peerj.9795)
Supplement: Supplemental Information 1 [file peerj-08-9795-s001.xlsx]

## Sheet: Metadata
Article title:	Epibiont Hydroids on Beachcast Sargassum in the Mexican Caribbean
Abstract:	Massive accumulations of pelagic Sargassum species have generated recent social, economic and ecological problems along Caribbean shores. In the Mexican Caribbean, these events have prompted the study of diverse biological and ecological aspects of these macroalgae. However, studies on their associated biota, such as Hydrozoa, remain scarce. The objective of this research was to determine the occ…
Lead investigator:	MARÍA A. MENDOZA-BECERRIL
Contact information:	m_angelesmb@hotmail.com, mmendoza@cibnor.mx
Collection dates:	2018-2019
Primary data sofware or service:	File format .xlsx
Tab name:	Hydrozoa and Sargassum spp.
Fields:
Thallus code	Code of the revised thalli. The rows with the same code correspond to fragments of the same collected thallus. For example, rows 8 and 9 of “Hydrozoa and Sargassum spp.” sheet with the code “CPM_1” belong to the thallus of Sargassum polyceratium var. ovatum collected in May 2018. This thallus (CPM_1) was divided into subsamples to have a sample of each epibiont hydroid taxa present in the thallus…
Lenght thallus	Lenght of Sargassum thallus in centimeter.
Revised material code	Codes of epibiont hydroids revised in the Centro de Investigaciones Biológicas del Noroeste.
Catalog number of hydroids in collection	Voucher specimens deposited in the collection of Cnidarians of the Gulf of Mexico and Mexican Caribbean “Lourdes Segura” (Faculty of Science, Multidisciplinary Teaching and Research Unit, Sisal, Yucatán, Mexico) under the code YUC–CC–254–11 from 001561 to 001569.
Taxa	taxa of epibiont hydroids.
Reproductive state	reproductive state of epibiont hydroids.
Sex	sex of epibiont hydroids.
Data	collection date of Sargassum thalli.
Country	country where the thalli were collected.
State	state where the thalli were collected.
Local	local where the thalli were collected.
Specific place	specific place where the thalli were collected.
species and morphotypes of Sargassum	thalli revised of benthic or pelagic species and morphotypes of Sargassum.
percentage of cover of epibiont hydroids	estimated by counting the number of square divisions occupied by macroalgae, with and without hydroids, on both sides of the plates (see methodology in article).
axe (0=absent; 1=present)	presence or absence of epibiont hydroids observed on axe.
leaf (0=absent; 1=present)	presence or absence of epibiont hydroids observed on leaf.
aerocyst (0=absent; 1=present)	presence or absence of epibiont hydroids observed on aerocyst.
other epibionts	other epibionts different to the Hydrozoa class.
Lat	distribution coordinates.
Long	distribution coordinates.
Tab name:	NDMs
Fields:
Groups	groups of thalli of pelagic species and morphotypes of Sargassum.
Av. Cov.	average hydroid cover.
Av. Sim.	average similarity.
Sim/SD	similarity to standard deviation ratio.
Contrib. %	percentage contribution.
Cum. %	cumulative percentage contribution.

## Sheet: Hydrozoa and Sargassum spp.
Thallus code	Lenght of thallus (cm)	Revised material code	Catalog number of epibiont hydroids in collection (YUC–CC–254–11)	Taxa	Reproductive state	Sex	Data	Country	State	Local	Specific place	species and morphotypes of Sargassum	percentage of cover of epibiont hydroids	axe (0=absent; 1=present)	leaf (0=absent; 1=present)	aerocyst (0=absent; 1=present)	other epibionts	Lat	Long
GMx_Y_1	15	GMx_Y_1	YUC-CC-254-11-001565	Obelia dichotoma	inmature	not apply	2018-04-19	Mexico	Quintana Roo	Puerto Morelos Beach	beachcast biomass strandings on the coastal line	Sargassum natans I	12.2222	1	1	1	Bryozoa, Polychaeta (Serpulid worms)	20,85	-86,87
GMx_Y_1	15	GMx_Y_2		Halopteris diaphana	inmature	not apply	2018-04-19	Mexico	Quintana Roo	Puerto Morelos Beach	beachcast biomass strandings on the coastal line	Sargassum natans I	25	1	1	0	Bryozoa, Polychaeta (Serpulid worms)	20,85	-86,87
GMx_Y_1	15	GMx_Y_5		Plumularia strictocarpa	inmature	not apply	2018-04-19	Mexico	Quintana Roo	Puerto Morelos Beach	beachcast biomass strandings on the coastal line	Sargassum natans I	9.25926	1	1	0	Bryozoa, Polychaeta (Serpulid worms)	20,85	-86,87
GMx_Y_3	16	GMx_Y_3		Clytia noliformis	inmature	not apply	2018-04-19	Mexico	Quintana Roo	Puerto Morelos Beach	beachcast biomass strandings on the coastal line	Sargassum fluitans III	60.5263	1	1	1	Bryozoa	20,85	-86,87
GMx_Y_3	16	GMx_Y_6		Halopteris diaphana	inmature	not apply	2018-04-19	Mexico	Quintana Roo	Puerto Morelos Beach	beachcast biomass strandings on the coastal line	Sargassum fluitans III	0.438596	1	0	0	Bryozoa	20,85	-86,87
GMx_Y_4	22	GMx_Y_4		Aglaophenia latecarinata	inmature	not apply	2018-04-19	Mexico	Quintana Roo	Puerto Morelos Beach	beachcast biomass strandings on the coastal line	Sargassum natans VIII	48.7633	1	1	1	Bryozoa	20,85	-86,87
CPM_1	18	CPM_1a		Tridentata marginata	inmature	not apply	2018-05-09	Mexico	Quintana Roo	Puerto Morelos Beach	beachcast biomass strandings on the coastal line	Sargassum polyceratium var. ovatum	42	0	1	0	Bryozoa	20,84	-86,87
CPM_1	18	CPM_2a	YUC-CC-254-11-001568	Tridentata turbinata	inmature	not apply	2018-05-09	Mexico	Quintana Roo	Puerto Morelos Beach	beachcast biomass strandings on the coastal line	Sargassum polyceratium var. ovatum	57.4074	1	1	1	Bryozoa	20,84	-86,87
CPM_3	28	CPM_3		Aglaophenia latecarinata	inmature	not apply	2018-05-09	Mexico	Quintana Roo	Puerto Morelos Beach	beachcast biomass strandings on the coastal line	Sargassum natans VIII	55.6338	0	1	1	Bryozoa, Polychaeta (Serpulid worms)	20,84	-86,87
CPM_4	10	CPM_4		Halopteris sp.	inmature	not apply	2018-05-09	Mexico	Quintana Roo	Puerto Morelos Beach	beachcast biomass strandings on the coastal line	Sargassum natans I	15.3846	1	0	0	Bryozoa	20,84	-86,87
CPM_5	29	CPM_5		Proboscoida	inmature	not apply	2018-05-09	Mexico	Quintana Roo	Puerto Morelos Beach	beachcast biomass strandings on the coastal line	Sargassum fluitans III	47.8947	1	1	0	Bryozoa (Jellyella tuberculata), Polychaeta (Serpulid worms)	20,84	-86,87
CPM_6	34	CPM_6		Aglaophenia latecarinata	inmature	not apply	2018-06-13	Mexico	Quintana Roo	Puerto Morelos Beach	beachcast biomass strandings on the coastal line	Sargassum natans VIII	59.7484	1	1	1	Bryozoa (Jellyella tuberculata), Polychaeta (Serpulid worms)	20,84	-86,87
CPM_7	14	CPM_7		Clytia noliformis	inmature	not apply	2018-06-13	Mexico	Quintana Roo	Puerto Morelos Beach	beachcast biomass strandings on the coastal line	Sargassum fluitans III	47.619	1	1	1	Bryozoa (Jellyella tuberculata)	20,84	-86,87
CPM_8	10	CPM_8		Obelia sp.	inmature	not apply	2018-06-13	Mexico	Quintana Roo	Puerto Morelos Beach	beachcast biomass strandings on the coastal line	Sargassum natans I	7.07547	0	1	0	Bryozoa (Jellyella tuberculata)	20,84	-86,87
CPM_9	17	CPM_9		Aglaophenia latecarinata	inmature	not apply	2018-07-09	Mexico	Quintana Roo	Puerto Morelos Beach	beachcast biomass strandings on the coastal line	Sargassum natans VIII	79.697	1	1	1	Bryozoa, Polychaeta (Serpulid worms)	20,84	-86,87
CPM_10	17	CPM_10		Clytia noliformis	inmature	not apply	2018-07-09	Mexico	Quintana Roo	Puerto Morelos Beach	beachcast biomass strandings on the coastal line	Sargassum fluitans III	30.3846	1	1	1	Bryozoa, Polychaeta (Serpulid worms)	20,84	-86,87
CPM_11	15	CPM_11a		Proboscoida	inmature	not apply	2018-07-09	Mexico	Quintana Roo	Puerto Morelos Beach	beachcast biomass strandings on the coastal line	Sargassum natans I	0.704225	0	1	0	Bryozoa, Polychaeta (Serpulid worms)	20,84	-86,87
CPM_11	15	CPM_11b		Zanclea alba	inmature	not apply	2018-07-09	Mexico	Quintana Roo	Puerto Morelos Beach	beachcast biomass strandings on the coastal line	Sargassum natans I	0.352113	0	0	1	Bryozoa, Polychaeta (Serpulid worms)	20,84	-86,87
CPM_00	15	CPM_00		Without epibiont hydroids (but with other epibionts)	not apply	not apply	2018-08-15	Mexico	Quintana Roo	Puerto Morelos Beach	beachcast biomass strandings on the coastal line	Sargassum natans I	not apply	not apply	not apply	not apply	Bryozoa	20,84	-86,87
CPM_12	21	CPM_12		Aglaophenia latecarinata	inmature	not apply	2018-08-15	Mexico	Quintana Roo	Puerto Morelos Beach	beachcast biomass strandings on the coastal line	Sargassum natans VIII	50.7042	1	1	1	Bryozoa, Polychaeta (Serpulid worms)	20,84	-86,87
CPM_13	17	CPM_13		Clytia noliformis	inmature	not apply	2018-08-15	Mexico	Quintana Roo	Puerto Morelos Beach	beachcast biomass strandings on the coastal line	Sargassum fluitans III	9.25926	1	0	0	Bryozoa, Polychaeta (Serpulid worms)	20,84	-86,87
CPM_14	15	CPM_14		Clytia noliformis	mature	indeterminate	2018-09-29	Mexico	Quintana Roo	Puerto Morelos Beach	beachcast biomass strandings on the coastal line	Sargassum natans I	24.1573	1	1	1	Bryozoa, Polychaeta (Serpulid worms)	20,84	-86,87
CPM_15	31	CPM_15	YUC-CC-254-11-001563	Clytia noliformis	inmature	not apply	2018-09-29	Mexico	Quintana Roo	Puerto Morelos Beach	beachcast biomass strandings on the coastal line	Sargassum fluitans III	29.3388	1	1	1	Bryozoa, Polychaeta (Serpulid worms)	20,84	-86,87
CPM_16	28	CPM_16a	YUC-CC-254-11-001561	Aglaophenia latecarinata	inmature	not apply	2018-09-29	Mexico	Quintana Roo	Puerto Morelos Beach	beachcast biomass strandings on the coastal line	Sargassum natans VIII	73.6842	1	1	1	Bryozoa, Polychaeta (Serpulid worms)	20,84	-86,87
CPM_16	28	CPM_16b		Clytia noliformis	inmature	not apply	2018-09-29	Mexico	Quintana Roo	Puerto Morelos Beach	beachcast biomass strandings on the coastal line	Sargassum natans VIII	2.63158	0	1	0	Bryozoa, Polychaeta (Serpulid worms)	20,84	-86,87
CPM_17	19	CPM_17		Aglaophenia latecarinata	inmature	not apply	2018-10-27	Mexico	Quintana Roo	Puerto Morelos Beach	beachcast biomass strandings on the coastal line	Sargassum natans VIII	86.8421	1	1	1	Bryozoa, Polychaeta (Serpulid worms)	20,84	-86,87
CPM_17	19	CPM_17a	YUC-CC-254-11-001562	Clytia hemisphaerica	mature	indeterminate (damaged)	2018-10-27	Mexico	Quintana Roo	Puerto Morelos Beach	beachcast biomass strandings on the coastal line	Sargassum natans VIII	60	1	1	1	Bryozoa, Polychaeta (Serpulid worms)	20,84	-86,87
CPM_18	18	CPM_18		Clytia noliformis	inmature	not apply	2018-10-27	Mexico	Quintana Roo	Puerto Morelos Beach	beachcast biomass strandings on the coastal line	Sargassum natans I	43.0556	1	1	1	Bryozoa, Polychaeta (Serpulid worms)	20,84	-86,87
CPM_18	18	CPM_18a		Zanclea alba	inmature	not apply	2018-10-27	Mexico	Quintana Roo	Puerto Morelos Beach	beachcast biomass strandings on the coastal line	Sargassum natans I	6.45161	1	0	0	Bryozoa, Polychaeta (Serpulid worms)	20,84	-86,87
CPM_20	8	CPM_20		Clytia noliformis	mature	indeterminate	2018-10-27	Mexico	Quintana Roo	Puerto Morelos Beach	beachcast biomass strandings on the coastal line	Sargassum fluitans III	70.9091	1	1	1	Bryozoa, Polychaeta (Serpulid worms)	20,84	-86,87
CPM_21	18	CPM_21	YUC-CC-254-11-001567	Tridentata marginata	mature	not apply	2018-10-24	Mexico	Quintana Roo	Puerto Morelos Beach	beachcast biomass strandings on the coastal line	Sargassum polyceratium var. ovatum	50	1	1	0	Bryozoa	20,84	-86,87
CPM_22	10	CPM_22		Clytia sp.	inmature	not apply	2018-11-28	Mexico	Quintana Roo	Puerto Morelos Beach	beachcast biomass strandings on the coastal line	Sargassum natans I	66.2791	1	1	1	Bryozoa, Polychaeta (Serpulid worms)	20,84	-86,87
CPM_23	19	CPM_23		Clytia noliformis	inmature	not apply	2018-11-28	Mexico	Quintana Roo	Puerto Morelos Beach	beachcast biomass strandings on the coastal line	Sargassum fluitans III	39.1026	1	1	1	Bryozoa, Polychaeta (Serpulid worms)	20,84	-86,87
CPM_23	19	CPM_23a		Plumulariidae	inmature	not apply	2018-11-28	Mexico	Quintana Roo	Puerto Morelos Beach	beachcast biomass strandings on the coastal line	Sargassum fluitans III	0.320513	1	0	0	Bryozoa, Polychaeta (Serpulid worms)	20,84	-86,87
CPM_24	16	CPM_24		Aglaophenia latecarinata	inmature	not apply	2018-11-28	Mexico	Quintana Roo	Puerto Morelos Beach	beachcast biomass strandings on the coastal line	Sargassum natans VIII	54.3011	1	1	1	Bryozoa, Polychaeta (Serpulid worms)	20,84	-86,87
CPM_25	10	CPM_25		Clytia noliformis	mature	indeterminate	2018-12-19	Mexico	Quintana Roo	Puerto Morelos Beach	beachcast biomass strandings on the coastal line	Sargassum fluitans III	63.5965	1	1	1	Bryozoa, Polychaeta (Serpulid worms)	20,84	-86,87
CPM_26	13	CPM_26		Halopteris diaphana	inmature	not apply	2018-12-19	Mexico	Quintana Roo	Puerto Morelos Beach	beachcast biomass strandings on the coastal line	Sargassum natans I	1.70455	1	0	0	Bryozoa, Polychaeta (Serpulid worms)	20,85	-86,87
CPM_26	13	CPM_26a		Zanclea alba	inmature	not apply	2018-12-19	Mexico	Quintana Roo	Puerto Morelos Beach	beachcast biomass strandings on the coastal line	Sargassum natans I	8.52273	1	1	1	Bryozoa, Polychaeta (Serpulid worms)	20,85	-86,87
CPM_27	17	CPM_27		Aglaophenia latecarinata	inmature	not apply	2018-12-19	Mexico	Quintana Roo	Puerto Morelos Beach	beachcast biomass strandings on the coastal line	Sargassum natans VIII	78.0488	1	1	1	Bryozoa, Polychaeta (Serpulid worms)	20,84	-86,87
CPM_27	17	CPM_27a		Halopteris diaphana	inmature	not apply	2018-12-19	Mexico	Quintana Roo	Puerto Morelos Beach	beachcast biomass strandings on the coastal line	Sargassum natans VIII	1.21951	1	0	0	Bryozoa, Polychaeta (Serpulid worms)	20,84	-86,87
CPM_27	17	CPM_27b	YUC-CC-254-11-001569	Zanclea alba	inmature	not apply	2018-12-19	Mexico	Quintana Roo	Puerto Morelos Beach	beachcast biomass strandings on the coastal line	Sargassum natans VIII	4.26829	1	1	0	Bryozoa, Polychaeta (Serpulid worms)	20,84	-86,87
CPM_28	17	CPM_28		Aglaophenia latecarinata	inmature	not apply	2019-01-23	Mexico	Quintana Roo	Puerto Morelos Beach	beachcast biomass strandings on the coastal line	Sargassum natans VIII	64.4531	1	1	1	Bryozoa, Polychaeta (Serpulid worms)	20,84	-86,87
CPM_28	17	CPM_28a	YUC-CC-254-11-001564	Halopteris diaphana	inmature	not apply	2019-01-23	Mexico	Quintana Roo	Puerto Morelos Beach	beachcast biomass strandings on the coastal line	Sargassum natans VIII	0.78125	1	0	0	Bryozoa, Polychaeta (Serpulid worms)	20,84	-86,87
CPM_29	11	CPM_29		Halopteris diaphana	inmature	not apply	2019-01-23	Mexico	Quintana Roo	Puerto Morelos Beach	beachcast biomass strandings on the coastal line	Sargassum fluitans III	3.40909	1	1	0	Bryozoa, Polychaeta (Serpulid worms)	20,84	-86,87
CPM_29	11	CPM_29a		Clytia noliformis	inmature	not apply	2019-01-23	Mexico	Quintana Roo	Puerto Morelos Beach	beachcast biomass strandings on the coastal line	Sargassum fluitans III	25	1	1	1	Bryozoa, Polychaeta (Serpulid worms)	20,84	-86,87
CPM_30	13	CPM_30		Clytia noliformis	inmature	not apply	2019-01-23	Mexico	Quintana Roo	Puerto Morelos Beach	beachcast biomass strandings on the coastal line	Sargassum natans I	24.4828	1	1	1	Bryozoa, Polychaeta (Serpulid worms)	20,84	-86,87
CPM_31	13	CPM_31		Halopteris diaphana	inmature	not apply	2019-02-27	Mexico	Quintana Roo	Puerto Morelos Beach	beachcast biomass strandings on the coastal line	Sargassum natans I	0.892857	1	0	0	Bryozoa, Polychaeta (Serpulid worms)	20,84	-86,87
CPM_31	13	CPM_31a		Clytia noliformis	inmature	not apply	2019-02-27	Mexico	Quintana Roo	Puerto Morelos Beach	beachcast biomass strandings on the coastal line	Sargassum natans I	89.2857	1	1	1	Bryozoa, Polychaeta (Serpulid worms)	20,84	-86,87
CPM_32	13	CPM_32		Aglaophenia latecarinata	inmature	not apply	2019-02-27	Mexico	Quintana Roo	Puerto Morelos Beach	beachcast biomass strandings on the coastal line	Sargassum natans VIII	58.0189	0	1	1	Bryozoa, Polychaeta (Serpulid worms)	20,84	-86,87
CPM_33	21	CPM_33		Obelia dichotoma	inmature	not apply	2019-02-27	Mexico	Quintana Roo	Puerto Morelos Beach	beachcast biomass strandings on the coastal line	Sargassum fluitans III	0.704225	1	0	0	Bryozoa, Polychaeta (Serpulid worms)	20,84	-86,87
CPM_33	21	CPM_33a		Clytia noliformis	inmature	not apply	2019-02-27	Mexico	Quintana Roo	Puerto Morelos Beach	beachcast biomass strandings on the coastal line	Sargassum fluitans III	29.5775	1	1	1	Bryozoa, Polychaeta (Serpulid worms)	20,84	-86,87
CPM_33	21	CPM_33b	YUC-CC-254-11-001566	Plumularia strictocarpa	inmature	not apply	2019-02-27	Mexico	Quintana Roo	Puerto Morelos Beach	beachcast biomass strandings on the coastal line	Sargassum fluitans III	19.7183	1	1	1	Bryozoa, Polychaeta (Serpulid worms)	20,84	-86,87
CPM_34	24	CPM_34		Obelia dichotoma	inmature	not apply	2019-03-27	Mexico	Quintana Roo	Puerto Morelos Beach	beachcast biomass strandings on the coastal line	Sargassum natans I	0.655022	1	0	0	Bryozoa, Polychaeta (Serpulid worms), other algae	20,84	-86,87
CPM_34	24	CPM_34a		Plumularia strictocarpa	inmature	not apply	2019-03-27	Mexico	Quintana Roo	Puerto Morelos Beach	beachcast biomass strandings on the coastal line	Sargassum natans I	1.74672	1	1	1	Bryozoa, Polychaeta (Serpulid worms), other algae	20,84	-86,87
CPM_34	24	CPM_34b		Zanclea alba	inmature	not apply	2019-03-27	Mexico	Quintana Roo	Puerto Morelos Beach	beachcast biomass strandings on the coastal line	Sargassum natans I	0.655022	1	0	0	Bryozoa, Polychaeta (Serpulid worms), other algae	20,84	-86,87
CPM_34	24	CPM_34c		Halopteris diaphana	inmature	not apply	2019-03-27	Mexico	Quintana Roo	Puerto Morelos Beach	beachcast biomass strandings on the coastal line	Sargassum natans I	0.218341	1	0	0	Bryozoa, Polychaeta (Serpulid worms), other algae	20,84	-86,87
CPM_35	38	CPM_35		Aglaophenia latecarinata	inmature	not apply	2019-03-27	Mexico	Quintana Roo	Puerto Morelos Beach	beachcast biomass strandings on the coastal line	Sargassum natans VIII	36.9347	1	1	1	Bryozoa, Polychaeta (Serpulid worms)	20,84	-86,87
CPM_36	38	CPM_36		Clytia noliformis	inmature	not apply	2019-03-27	Mexico	Quintana Roo	Puerto Morelos Beach	beachcast biomass strandings on the coastal line	Sargassum fluitans III	34.2672	1	1	1	Bryozoa, Polychaeta (Serpulid worms)	20,84	-86,87

## Sheet: NDMs
Groups	Av. Cov.	Av. Sim.	Sim/SD	Contrib. %	Cum. %
Sargassum fluitans X
Average similarity: 89.32
Clytia noliformis	9.73	89.19	5.87	99.85	99.85
Sargassum natans I
Average similarity: 34.79
Clytia noliformis	4.91	18.96	0.51	54.49	54.49
Zanclea alba	3.97	11.55	0.63	33.21	87.70
Halopteris diaphana	1.77	2.71	0.44	7.79	95.49
Sargassum natans VIII
Average similarity: 89.26
Aglaophenia latecarinata	9.76	89.13	6.60	99.85	99.85
